# Supplementary material for: Impact on pulmonary, cardiac, and renal function and long-term quality of life after hospitalization for acute respiratory distress syndrome due to COVID-19: Protocol of the Post-COVID Brazil 3 study
Source: PubMed Central journal article supplement (PMC11152444; doi:10.62675/2965-2774.20240258-en), 2024-06-05
Supplement: 2965-2774-ccsci-36-e20240258en-pt-supp01.pdf [file 2965-2774-ccsci-36-e20240258en-pt-supp01.pdf]

# Impacto nas funções pulmonar, cardíaca e renal e na qualidade de vida a longo prazo após internação por síndrome do desconforto respiratório agudo por COVID-19: protocolo do Estudo 3 Pós-COVID Brasil

Fernando Luís Scolari<sup>1</sup>, Marciane Maria Rover<sup>1</sup>, Geraldine Trott<sup>1</sup>, Mariana Motta Dias da Silva<sup>2</sup>, Denise de Souza<sup>1</sup>, Raine Fogliati de Carli Schardosim<sup>1</sup>, Rosa da Rosa Minho dos Santos<sup>1</sup>, Emelyn de Souza Roldão<sup>1</sup>, Duane Mocellin<sup>1</sup>, Jennifer Menna Barreto de Souza<sup>1</sup>, Aline Paula Miozzo<sup>1</sup>, Gabriela Soares Rech<sup>1</sup>, Carolina Rothmann Itaquí<sup>1</sup>, Juliana de Mesquita Neto<sup>1</sup>, Gabriel Pozza Muller Estivalet<sup>1</sup>, Hellen Jordan Martins Freitas<sup>1</sup>, Catherine Vitória Pereira dos Santos<sup>1</sup>, Lucas Gobetti da Luz<sup>2</sup>, Marcelo Kern<sup>4</sup>, Milena Soriano Marcolino<sup>5</sup>, Bruna Brandão Barreto<sup>6</sup>, Paulo R. Schwartzman<sup>7</sup>, Ana Carolina Peçanha Antonio<sup>8</sup>, Maicon Falavigna<sup>9</sup>, Caroline Cabral Robinson<sup>1</sup>, Carisi Anne Polanczy<sup>7</sup>, Regis Goulart Rosa<sup>1</sup>

## Ficha de coleta de dados dos exames complementares

| Resultados dos exames                      |                                                                                                    |
|--------------------------------------------|----------------------------------------------------------------------------------------------------|
| ID                                         |                                                                                                    |
| Informações do participante                |                                                                                                    |
| Nome                                       | [dados_basais_arm_1][nome_partic]                                                                  |
| Sexo                                       | [dados_basais_arm_1][sexo]                                                                         |
| Paciente liberado para os seguintes exames |                                                                                                    |
| Espirometria                               | [teleconsulta_1_arm_1][espiro]                                                                     |
| Ergoespirometria                           | [teleconsulta_1_arm_1][ergo]                                                                       |
| Ressonância                                | [teleconsulta_1_arm_1][resso]                                                                      |
| Tomografia                                 | [teleconsulta_1_arm_1][tomo]                                                                       |
| Termo de Consentimento presencial          |                                                                                                    |
| Espirometria                               |                                                                                                    |
| Espirometria foi realizada?                | <input type="checkbox"/> Sim<br><input type="checkbox"/> Não                                       |
| Motivo da não realização                   | <input type="checkbox"/> Contraindicação pré-especificada<br><input type="checkbox"/> Outro motivo |
| Qual outro motivo?                         | .....                                                                                              |
| Data do exame                              | .....                                                                                              |
| VEF1 (L)                                   | .....                                                                                              |
| VEF1 (% do previsto)                       | .....                                                                                              |
| VEF1/CVF (% do previsto)                   | .....                                                                                              |
| Capacidade vital forçada                   | .....                                                                                              |
| Capacidade vital forçada (%)               | .....                                                                                              |
| Capacidade pulmonar total (% do previsto)  | .....                                                                                              |
| Volume residual (L)                        | .....                                                                                              |
| Volume residual (% do previsto)            | .....                                                                                              |
| Difusão de monóxido de carbono (DLCO)      | .....                                                                                              |
| DLCO/VA (%)                                | .....                                                                                              |

Continua...

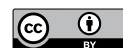

...continuação

| <b>Ergoespirometria</b>                                                          |                                                                                                                                                                                                                                               |
|----------------------------------------------------------------------------------|-----------------------------------------------------------------------------------------------------------------------------------------------------------------------------------------------------------------------------------------------|
| Ergoespirometria foi realizada?                                                  | <input type="checkbox"/> Sim<br><input type="checkbox"/> Não                                                                                                                                                                                  |
| Motivo da não realização                                                         | <input type="checkbox"/> Contraindicação pré-especificada<br><input type="checkbox"/> Outro motivo                                                                                                                                            |
| Qual outro motivo?                                                               | .....                                                                                                                                                                                                                                         |
| Data do exame                                                                    | .....                                                                                                                                                                                                                                         |
| VO <sub>2</sub> pico (mL.kg.minuto)                                              | .....                                                                                                                                                                                                                                         |
| VO <sub>2</sub> pico (L/minuto)                                                  | .....                                                                                                                                                                                                                                         |
| VE/VCO <sub>2</sub> slope                                                        | .....                                                                                                                                                                                                                                         |
| RER ou Rq ou equivalente resp (Rpico)                                            | .....                                                                                                                                                                                                                                         |
| Saturação de O <sub>2</sub> queda                                                | <input type="checkbox"/> Sim<br><input type="checkbox"/> Não                                                                                                                                                                                  |
| Menor valor (%)                                                                  | .....                                                                                                                                                                                                                                         |
| Pulso de oxigênio de pico (PuO <sub>2</sub> ) VO <sub>2</sub> /FC (mL/batimento) | .....                                                                                                                                                                                                                                         |
| FC repouso (bpm)                                                                 | .....                                                                                                                                                                                                                                         |
| FC pico (bpm)                                                                    | .....                                                                                                                                                                                                                                         |
| FC pico (% do previsto)                                                          | .....                                                                                                                                                                                                                                         |
| PAS repouso (mmHg)                                                               | .....                                                                                                                                                                                                                                         |
| PAD repouso (mmHg)                                                               | .....                                                                                                                                                                                                                                         |
| PAS pico do esforço (mmHg)                                                       | .....                                                                                                                                                                                                                                         |
| PAD pico do esforço (mmHg)                                                       | .....                                                                                                                                                                                                                                         |
| Limiares identificados                                                           | <input type="checkbox"/> Sim<br><input type="checkbox"/> Não                                                                                                                                                                                  |
| VO <sub>2</sub> no primeiro limiar ventilatório                                  | .....                                                                                                                                                                                                                                         |
| FC no primeiro limiar ventilatório                                               | .....                                                                                                                                                                                                                                         |
| VO <sub>2</sub> no segundo limiar                                                | .....                                                                                                                                                                                                                                         |
| FC no segundo limiar                                                             | .....                                                                                                                                                                                                                                         |
| Presença de ventilação periódica                                                 | <input type="checkbox"/> Sim<br><input type="checkbox"/> Não                                                                                                                                                                                  |
| OUES                                                                             | .....                                                                                                                                                                                                                                         |
| PetCO <sub>2</sub> em repouso (mmHg)                                             | .....                                                                                                                                                                                                                                         |
| O exame foi interrompido?                                                        | <input type="checkbox"/> Sim<br><input type="checkbox"/> Não                                                                                                                                                                                  |
| Motivo da interrupção do exame                                                   | <input type="checkbox"/> Fadiga geral<br><input type="checkbox"/> Fadiga em membros inferiores<br><input type="checkbox"/> Angina<br><input type="checkbox"/> Dispneia<br><input type="checkbox"/> Tontura<br><input type="checkbox"/> Outros |
| <b>Ressonância magnética estudo dinâmico (sem estresse)</b>                      |                                                                                                                                                                                                                                               |
| Ressonância magnética estudo dinâmico (sem estresse) foi realizada?              | <input type="checkbox"/> Sim<br><input type="checkbox"/> Não                                                                                                                                                                                  |
| Motivo da não realização                                                         | <input type="checkbox"/> Contraindicação pré-especificada<br><input type="checkbox"/> Outro motivo                                                                                                                                            |
| Qual outro motivo?                                                               | .....                                                                                                                                                                                                                                         |
| Data do exame                                                                    | .....                                                                                                                                                                                                                                         |
| Fração de ejeção do ventrículo esquerdo (VE) (%)                                 | .....                                                                                                                                                                                                                                         |

Continua...

...continuação

|                                                                                                        |                                                                                                                                                                                                        |
|--------------------------------------------------------------------------------------------------------|--------------------------------------------------------------------------------------------------------------------------------------------------------------------------------------------------------|
| Volume sistólico final de VE                                                                           | .....                                                                                                                                                                                                  |
| Volume diastólico final de VE (indexado para SC) (mL/m <sup>2</sup> )                                  | .....                                                                                                                                                                                                  |
| Volume efetivo de VE (mL/m <sub>2</sub> )                                                              | .....                                                                                                                                                                                                  |
| Massa ventricular esquerda (index) (g/m <sup>2</sup> )                                                 | .....                                                                                                                                                                                                  |
| Fração de ejeção do ventrículo direito (VD) (%)                                                        | .....                                                                                                                                                                                                  |
| Volume diastólico final de VD                                                                          | .....                                                                                                                                                                                                  |
| Volume sistólico final de VD                                                                           | .....                                                                                                                                                                                                  |
| Volume efetivo de VD (mL/m <sup>2</sup> )                                                              | .....                                                                                                                                                                                                  |
| Volume do VD (mL/m <sup>2</sup> )                                                                      | .....                                                                                                                                                                                                  |
| Mapa de T1 (ms)                                                                                        | .....                                                                                                                                                                                                  |
| Mapa de T2 (ms)                                                                                        | .....                                                                                                                                                                                                  |
| Realce tardio pericárdico                                                                              | <input type="checkbox"/> Sim<br><input type="checkbox"/> Não                                                                                                                                           |
| Derrame pericárdico (> 10mm)                                                                           | <input type="checkbox"/> Sim<br><input type="checkbox"/> Não                                                                                                                                           |
| Realce tardio (fibrose)                                                                                | <input type="checkbox"/> Sim<br><input type="checkbox"/> Não                                                                                                                                           |
| Padrão                                                                                                 | <input type="checkbox"/> Isquêmico<br><input type="checkbox"/> Não isquêmico                                                                                                                           |
| % de realce tardio (fibrose)                                                                           | .....                                                                                                                                                                                                  |
| <b>Ressonância magnética de abdome</b>                                                                 |                                                                                                                                                                                                        |
| Ressonância magnética de abdome foi realizada?                                                         | <input type="checkbox"/> Sim<br><input type="checkbox"/> Não                                                                                                                                           |
| Tamanho dos rins (cm)                                                                                  | ..... cm                                                                                                                                                                                               |
| Tamanho do rim direito                                                                                 | ..... cm                                                                                                                                                                                               |
| Tamanho do rim esquerdo                                                                                | ..... cm                                                                                                                                                                                               |
| Espessura do parênquima medida no plano axial (evitando cicatrizes) (cm)                               | ..... cm                                                                                                                                                                                               |
| Rim direito                                                                                            | ..... cm                                                                                                                                                                                               |
| Rim esquerdo                                                                                           | ..... cm                                                                                                                                                                                               |
| Volume dos rins (com base nas medidas e cálculo do volume como elipse – constante multiplicadora 0,52) | ..... cm                                                                                                                                                                                               |
| Rim direito                                                                                            | ..... cm <sup>3</sup>                                                                                                                                                                                  |
| Rim esquerdo                                                                                           | ..... cm <sup>3</sup>                                                                                                                                                                                  |
| Padrão de impregnação pelo meio de contraste na fase venosa                                            | <input type="checkbox"/> Homogêneo<br><input type="checkbox"/> Heterogêneo<br><input type="checkbox"/> Alteração focal, sugestiva de cicatriz                                                          |
| Padrão da intensidade de sinal                                                                         | <input type="checkbox"/> Homogêneo<br><input type="checkbox"/> Heterogêneo<br><input type="checkbox"/> Alteração focal (não incluir cistos ou lesões sólidas nesse item)                               |
| Morfologia dos sistemas pielocaliciais                                                                 | <input type="checkbox"/> Normal<br><input type="checkbox"/> Hidronefrose difusa e bilateral<br><input type="checkbox"/> Hidronefrose difusa e unilateral<br><input type="checkbox"/> Caliectasia focal |
| Análise comparativa com exame prévio da internação?                                                    | <input type="checkbox"/> Sim<br><input type="checkbox"/> Não                                                                                                                                           |
| Considerações                                                                                          | <input type="checkbox"/> Dimensões renais estáveis<br><input type="checkbox"/> Redução das dimensões dos rins<br><input type="checkbox"/> Surgimento de alteração/lesão focal                          |

Continua...

...continuação

| <b>Tomografia de tórax de alta resolução (SEM contraste)</b>                                              |                                                                                                                                                                                                                                                                                        |
|-----------------------------------------------------------------------------------------------------------|----------------------------------------------------------------------------------------------------------------------------------------------------------------------------------------------------------------------------------------------------------------------------------------|
| Tomografia de tórax de alta resolução (SEM contraste) foi realizada?                                      | <input type="checkbox"/> Sim<br><input type="checkbox"/> Não                                                                                                                                                                                                                           |
| Motivo da não realização                                                                                  | <input type="checkbox"/> Contraindicação pré-especificada<br><input type="checkbox"/> Outro motivo                                                                                                                                                                                     |
| Qual outro motivo?                                                                                        | .....                                                                                                                                                                                                                                                                                  |
| Data do exame                                                                                             | .....                                                                                                                                                                                                                                                                                  |
| Há presença de acometimento do parênquima pulmonar?                                                       | <input type="checkbox"/> Sim<br><input type="checkbox"/> Não                                                                                                                                                                                                                           |
| Percentual de acometimento                                                                                | <input type="checkbox"/> Inferior a 25%<br><input type="checkbox"/> 25% a 50%<br><input type="checkbox"/> 51% a 75%<br><input type="checkbox"/> > 75%                                                                                                                                  |
| Tipo de acometimento do parênquima pulmonar                                                               | <input type="checkbox"/> Infiltrado em vidro fosco<br><input type="checkbox"/> Pneumonia intersticial fibrosante<br><input type="checkbox"/> Cicatriz fibrosante<br><input type="checkbox"/> Consolidação<br><input type="checkbox"/> Enfisema<br><input type="checkbox"/> Outro ..... |
| Nível do enfisema                                                                                         | <input type="checkbox"/> Leve<br><input type="checkbox"/> Moderado<br><input type="checkbox"/> Grave                                                                                                                                                                                   |
| <b>Avaliação de sarcopenia</b>                                                                            |                                                                                                                                                                                                                                                                                        |
| Qual unidade de medida da área de secção transversal?                                                     | <input type="checkbox"/> cm <sup>2</sup><br><input type="checkbox"/> mm <sup>2</sup>                                                                                                                                                                                                   |
| Qual a área de secção transversal da musculatura peitoral (mensurar imediatamente abaixo do arco aórtico) | .....                                                                                                                                                                                                                                                                                  |
| Densidade muscular média nesse nível (unidades Housefield)                                                | .....                                                                                                                                                                                                                                                                                  |
| Calcificações coronarianas?                                                                               | <input type="checkbox"/> Sim<br><input type="checkbox"/> Não<br><input type="checkbox"/> Não avaliado                                                                                                                                                                                  |
