# Supplementary material for: Impact on pulmonary, cardiac, and renal function and long-term quality of life after hospitalization for acute respiratory distress syndrome due to COVID-19: Protocol of the Post-COVID Brazil 3 study
Source: PubMed Central journal article supplement (PMC11152444; doi:10.62675/2965-2774.20240258-en), 2024-06-05
Supplement: 2965-2774-ccsci-36-e20240258en-supp01.pdf [file 2965-2774-ccsci-36-e20240258en-supp01.pdf]

## Impact on pulmonary, cardiac, and renal function and long-term quality of life after hospitalization for acute respiratory distress syndrome due to COVID-19: Protocol of the Post-COVID Brazil 3 study

Fernando Luís Scolari<sup>1</sup>, Marciane Maria Rover<sup>1</sup>, Geraldine Trott<sup>1</sup>, Mariana Motta Dias da Silva<sup>2</sup>, Denise de Souza<sup>1</sup>, Raine Fogliati de Carli Schardosim<sup>1</sup>, Rosa da Rosa Minho dos Santos<sup>1</sup>, Emelyn de Souza Roldão<sup>1</sup>, Duane Mocellin<sup>1</sup>, Jennifer Menna Barreto de Souza<sup>1</sup>, Aline Paula Miozzo<sup>1</sup>, Gabriela Soares Rech<sup>1</sup>, Carolina Rothmann Itaquí<sup>1</sup>, Juliana de Mesquita Neto<sup>1</sup>, Gabriel Pozza Muller Estivalet<sup>1</sup>, Hellen Jordan Martins Freitas<sup>1</sup>, Catherine Vitória Pereira dos Santos<sup>1</sup>, Lucas Gobetti da Luz<sup>2</sup>, Marcelo Kern<sup>4</sup>, Milena Soriano Marcolino<sup>5</sup>, Bruna Brandão Barreto<sup>6</sup>, Paulo R. Schwartzman<sup>7</sup>, Ana Carolina Peçanha Antonio<sup>8</sup>, Maicon Falavigna<sup>9</sup>, Caroline Cabral Robinson<sup>1</sup>, Carisi Anne Polanczy<sup>1</sup>, Regis Goulart Rosa<sup>1</sup>

### Data collection form for the complementary exams

|                                                 |                                                                                                   |
|-------------------------------------------------|---------------------------------------------------------------------------------------------------|
| <b>Exam results</b>                             |                                                                                                   |
| ID                                              |                                                                                                   |
| <b>Participant information</b>                  |                                                                                                   |
| Name                                            | [baseline data_arm_1][part name]                                                                  |
| Sex                                             | [baseline data_arm_1][sex]                                                                        |
| <b>Patient released for the following exams</b> |                                                                                                   |
| Spirometry                                      | [teleconsultation_1_arm_1][spiro]                                                                 |
| Ergospirometry                                  | [teleconsultation_1_arm_1][ergo]                                                                  |
| Resonance                                       | [teleconsultation_1_arm_1][reso]                                                                  |
| Tomography                                      | [teleconsultation_1_arm_1][tomo]                                                                  |
| Term of Consent in person                       |                                                                                                   |
| <b>Spirometry</b>                               |                                                                                                   |
| Was spirometry performed?                       | <input type="checkbox"/> Yes<br><input type="checkbox"/> No                                       |
| Reason for nonperformance                       | <input type="checkbox"/> Prespecified contraindication<br><input type="checkbox"/> Another reason |
| What other reason?                              | .....                                                                                             |
| Date of exam                                    | .....                                                                                             |
| VEF1 (L)                                        | .....                                                                                             |
| VEF1 (% do predicted)                           | .....                                                                                             |
| VEF1/CVF (% do predicted)                       | .....                                                                                             |
| Forced vital capacity                           | .....                                                                                             |
| Forced vital capacity (%)                       | .....                                                                                             |
| Total lung capacity (% of predicted)            | .....                                                                                             |
| Residual volume (L)                             | .....                                                                                             |
| Residual volume (% of predicted)                | .....                                                                                             |
| Diffusion of carbon monoxide (DLCO)             | .....                                                                                             |
| DLCO/VA (%)                                     | .....                                                                                             |

Continue...

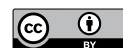

...continuation

| <b>Ergospirometry</b>                                               |                                                                                                                                                                                                                                             |
|---------------------------------------------------------------------|---------------------------------------------------------------------------------------------------------------------------------------------------------------------------------------------------------------------------------------------|
| Was ergospirometry performed?                                       | <input type="checkbox"/> Yes<br><input type="checkbox"/> No                                                                                                                                                                                 |
| Reason for nonperformance                                           | <input type="checkbox"/> Prespecified contraindication<br><input type="checkbox"/> Another reason                                                                                                                                           |
| What other reason?                                                  | .....                                                                                                                                                                                                                                       |
| Exam date                                                           | .....                                                                                                                                                                                                                                       |
| Peak VO <sub>2</sub> (mL/kg/minute)                                 | .....                                                                                                                                                                                                                                       |
| Peak VO <sub>2</sub> (L/minute)                                     | .....                                                                                                                                                                                                                                       |
| VE/VCO <sub>2</sub> slope                                           | .....                                                                                                                                                                                                                                       |
| RER or Rq or equivalent resp (Rpeak)                                | .....                                                                                                                                                                                                                                       |
| O <sub>2</sub> saturation drop                                      | <input type="checkbox"/> Yes<br><input type="checkbox"/> No                                                                                                                                                                                 |
| Lowest value (%)                                                    | .....                                                                                                                                                                                                                                       |
| Peak oxygen pulse (PuO <sub>2</sub> ) VO <sub>2</sub> /HR (mL/beat) | .....                                                                                                                                                                                                                                       |
| Resting HR (bpm)                                                    | .....                                                                                                                                                                                                                                       |
| Peak HR (bpm)                                                       | .....                                                                                                                                                                                                                                       |
| Peak HR (% of predicted)                                            | .....                                                                                                                                                                                                                                       |
| Resting SAP (mmHg)                                                  | .....                                                                                                                                                                                                                                       |
| Resting DBP (mmHg)                                                  | .....                                                                                                                                                                                                                                       |
| SBP peak exertion (mmHg)                                            | .....                                                                                                                                                                                                                                       |
| DBP peak exertion (mmHg)                                            | .....                                                                                                                                                                                                                                       |
| Identified thresholds                                               | <input type="checkbox"/> Yes<br><input type="checkbox"/> No                                                                                                                                                                                 |
| VO <sub>2</sub> at the first ventilatory threshold                  | .....                                                                                                                                                                                                                                       |
| HR at the first ventilatory threshold                               | .....                                                                                                                                                                                                                                       |
| VO <sub>2</sub> at the second threshold                             | .....                                                                                                                                                                                                                                       |
| HR at the second threshold                                          | .....                                                                                                                                                                                                                                       |
| Presence of periodic ventilation                                    | <input type="checkbox"/> Yes<br><input type="checkbox"/> No                                                                                                                                                                                 |
| OUES                                                                | .....                                                                                                                                                                                                                                       |
| PetCO <sub>2</sub> at rest (mmHg)                                   | .....                                                                                                                                                                                                                                       |
| Was the exam interrupted?                                           | <input type="checkbox"/> Yes<br><input type="checkbox"/> No                                                                                                                                                                                 |
| Reason for interruption of the exam                                 | <input type="checkbox"/> General fatigue<br><input type="checkbox"/> Fatigue in lower limbs<br><input type="checkbox"/> Angina<br><input type="checkbox"/> Dyspnea<br><input type="checkbox"/> Dizziness<br><input type="checkbox"/> Others |
| <b>Dynamic magnetic resonance imaging (nonstress)</b>               |                                                                                                                                                                                                                                             |
| Dynamic (nonstress) magnetic resonance imaging performed?           | <input type="checkbox"/> Yes<br><input type="checkbox"/> No                                                                                                                                                                                 |
| Reason for nonperformance                                           | <input type="checkbox"/> Prespecified contraindication<br><input type="checkbox"/> Another reason                                                                                                                                           |
| What other reason?                                                  | .....                                                                                                                                                                                                                                       |
| Exam date                                                           | .....                                                                                                                                                                                                                                       |
| Left ventricular (LV) ejection fraction (%)                         | .....                                                                                                                                                                                                                                       |

Continue...

...continuation

|                                                                                                              |                                                                                                                                                                                                               |
|--------------------------------------------------------------------------------------------------------------|---------------------------------------------------------------------------------------------------------------------------------------------------------------------------------------------------------------|
| LV end-systolic volume                                                                                       | .....                                                                                                                                                                                                         |
| LV end-diastolic volume (indexed to BS) (mL/m <sup>2</sup> )                                                 | .....                                                                                                                                                                                                         |
| Effective LV volume (mL/m <sub>2</sub> )                                                                     | .....                                                                                                                                                                                                         |
| Left ventricular mass (index) (g/m <sup>2</sup> )                                                            | .....                                                                                                                                                                                                         |
| Right ventricular (RV) ejection fraction (%)                                                                 | .....                                                                                                                                                                                                         |
| RV end-diastolic volume                                                                                      | .....                                                                                                                                                                                                         |
| RV end-systolic volume                                                                                       | .....                                                                                                                                                                                                         |
| RV stroke volume (mL/m <sup>2</sup> )                                                                        | .....                                                                                                                                                                                                         |
| RV volume (mL/m <sup>2</sup> )                                                                               | .....                                                                                                                                                                                                         |
| Map of T1 (ms)                                                                                               | .....                                                                                                                                                                                                         |
| Map of T2 (ms)                                                                                               | .....                                                                                                                                                                                                         |
| Pericardial delayed enhancement                                                                              | <input type="checkbox"/> Yes<br><input type="checkbox"/> No                                                                                                                                                   |
| Pericardial effusion (> 10 mm)                                                                               | <input type="checkbox"/> Yes<br><input type="checkbox"/> No                                                                                                                                                   |
| Delayed enhancement (fibrosis)                                                                               | <input type="checkbox"/> Yes<br><input type="checkbox"/> No                                                                                                                                                   |
| Standard                                                                                                     | <input type="checkbox"/> Ischemic<br><input type="checkbox"/> Nonischemic                                                                                                                                     |
| % of delayed enhancement (fibrosis)                                                                          | .....                                                                                                                                                                                                         |
| <b>Abdominal magnetic resonance imaging</b>                                                                  |                                                                                                                                                                                                               |
| Was abdominal magnetic resonance imaging performed?                                                          | <input type="checkbox"/> Yes<br><input type="checkbox"/> No                                                                                                                                                   |
| Kidney size (cm)                                                                                             | ..... cm                                                                                                                                                                                                      |
| Right kidney size                                                                                            | ..... cm                                                                                                                                                                                                      |
| Left kidney size                                                                                             | ..... cm                                                                                                                                                                                                      |
| Parenchyma thickness measured in the axial plane (avoiding scarring) (cm)                                    | ..... cm                                                                                                                                                                                                      |
| Right kidney                                                                                                 | ..... cm                                                                                                                                                                                                      |
| Left kidney                                                                                                  | ..... cm                                                                                                                                                                                                      |
| Kidney volume (based on measurements and calculation of the volume as an ellipse – multiplier constant 0.52) | ..... cm                                                                                                                                                                                                      |
| Right kidney                                                                                                 | ..... cm <sup>3</sup>                                                                                                                                                                                         |
| Left kidney                                                                                                  | ..... cm <sup>3</sup>                                                                                                                                                                                         |
| Pattern of contrast uptake in the venous phase                                                               | <input type="checkbox"/> Homogeneous<br><input type="checkbox"/> Heterogeneous<br><input type="checkbox"/> Focal change suggestive of scarring                                                                |
| Signal strength standard                                                                                     | <input type="checkbox"/> Homogeneous<br><input type="checkbox"/> Heterogeneous<br><input type="checkbox"/> Focal change (do not include cysts or solid lesions in this item)                                  |
| Morphology of pyelocaliceal systems                                                                          | <input type="checkbox"/> Normal<br><input type="checkbox"/> Diffuse and bilateral hydronephrosis<br><input type="checkbox"/> Diffuse, unilateral hydronephrosis<br><input type="checkbox"/> Focal caliectasis |
| Comparative analysis with examination before admission?                                                      | <input type="checkbox"/> Yes<br><input type="checkbox"/> No                                                                                                                                                   |
| Considerations                                                                                               | <input type="checkbox"/> Stable renal dimensions<br><input type="checkbox"/> Reduction in the size of the kidneys<br><input type="checkbox"/> Emergence of focal change/lesion                                |

Continue...

...continuation

| <b>High-resolution chest tomography (noncontrast)</b>                                                |                                                                                                                                                                                                                                                                                     |
|------------------------------------------------------------------------------------------------------|-------------------------------------------------------------------------------------------------------------------------------------------------------------------------------------------------------------------------------------------------------------------------------------|
| Was high-resolution tomography of the chest (noncontrast) performed?                                 | <input type="checkbox"/> Yes<br><input type="checkbox"/> No                                                                                                                                                                                                                         |
| Reason for nonperformance                                                                            | <input type="checkbox"/> Prespecified contraindication<br><input type="checkbox"/> Another reason                                                                                                                                                                                   |
| What other reason?                                                                                   | .....                                                                                                                                                                                                                                                                               |
| Exam date                                                                                            | .....                                                                                                                                                                                                                                                                               |
| Is there involvement of the lung parenchyma?                                                         | <input type="checkbox"/> Yes<br><input type="checkbox"/> No                                                                                                                                                                                                                         |
| Percentage of involvement                                                                            | <input type="checkbox"/> Less than 25%<br><input type="checkbox"/> 25% a 50%<br><input type="checkbox"/> 51% a 75%<br><input type="checkbox"/> > 75%                                                                                                                                |
| Type of lung parenchyma involvement                                                                  | <input type="checkbox"/> Infiltrated in frosted glass<br><input type="checkbox"/> Fibrosing interstitial pneumonia<br><input type="checkbox"/> Fibrous scar<br><input type="checkbox"/> Consolidation<br><input type="checkbox"/> Emphysema<br><input type="checkbox"/> Other ..... |
| Emphysema level                                                                                      | <input type="checkbox"/> Lightweight<br><input type="checkbox"/> Moderate<br><input type="checkbox"/> Severe                                                                                                                                                                        |
| <b>Evaluation of sarcopenia</b>                                                                      |                                                                                                                                                                                                                                                                                     |
| What is the unit of measurement for the cross-sectional area?                                        | <input type="checkbox"/> cm <sup>2</sup><br><input type="checkbox"/> mm <sup>2</sup>                                                                                                                                                                                                |
| What is the cross-sectional area of the pectoral muscles (measure immediately below the aortic arch) | .....                                                                                                                                                                                                                                                                               |
| Mean muscle density at this level (Hounsfield units)                                                 | .....                                                                                                                                                                                                                                                                               |
| Coronary calcifications?                                                                             | <input type="checkbox"/> Yes<br><input type="checkbox"/> No<br><input type="checkbox"/> Not evaluated                                                                                                                                                                               |
